# Supplementary material for: Dual Energy X-Ray Absorptiometry Body Composition Reference Values from NHANES
Source: PLoS One. 2009 Sep 15;4(9):e7038. doi: 10.1371/journal.pone.0007038 (PMC2737140; doi:10.1371/journal.pone.0007038)

**Figure S3:** % Fat Trunk / % Fat Legs vs. Age in adults. Solid lines indicate the 3<sup>rd</sup>, 50<sup>th</sup>, and 97<sup>th</sup> percentiles.

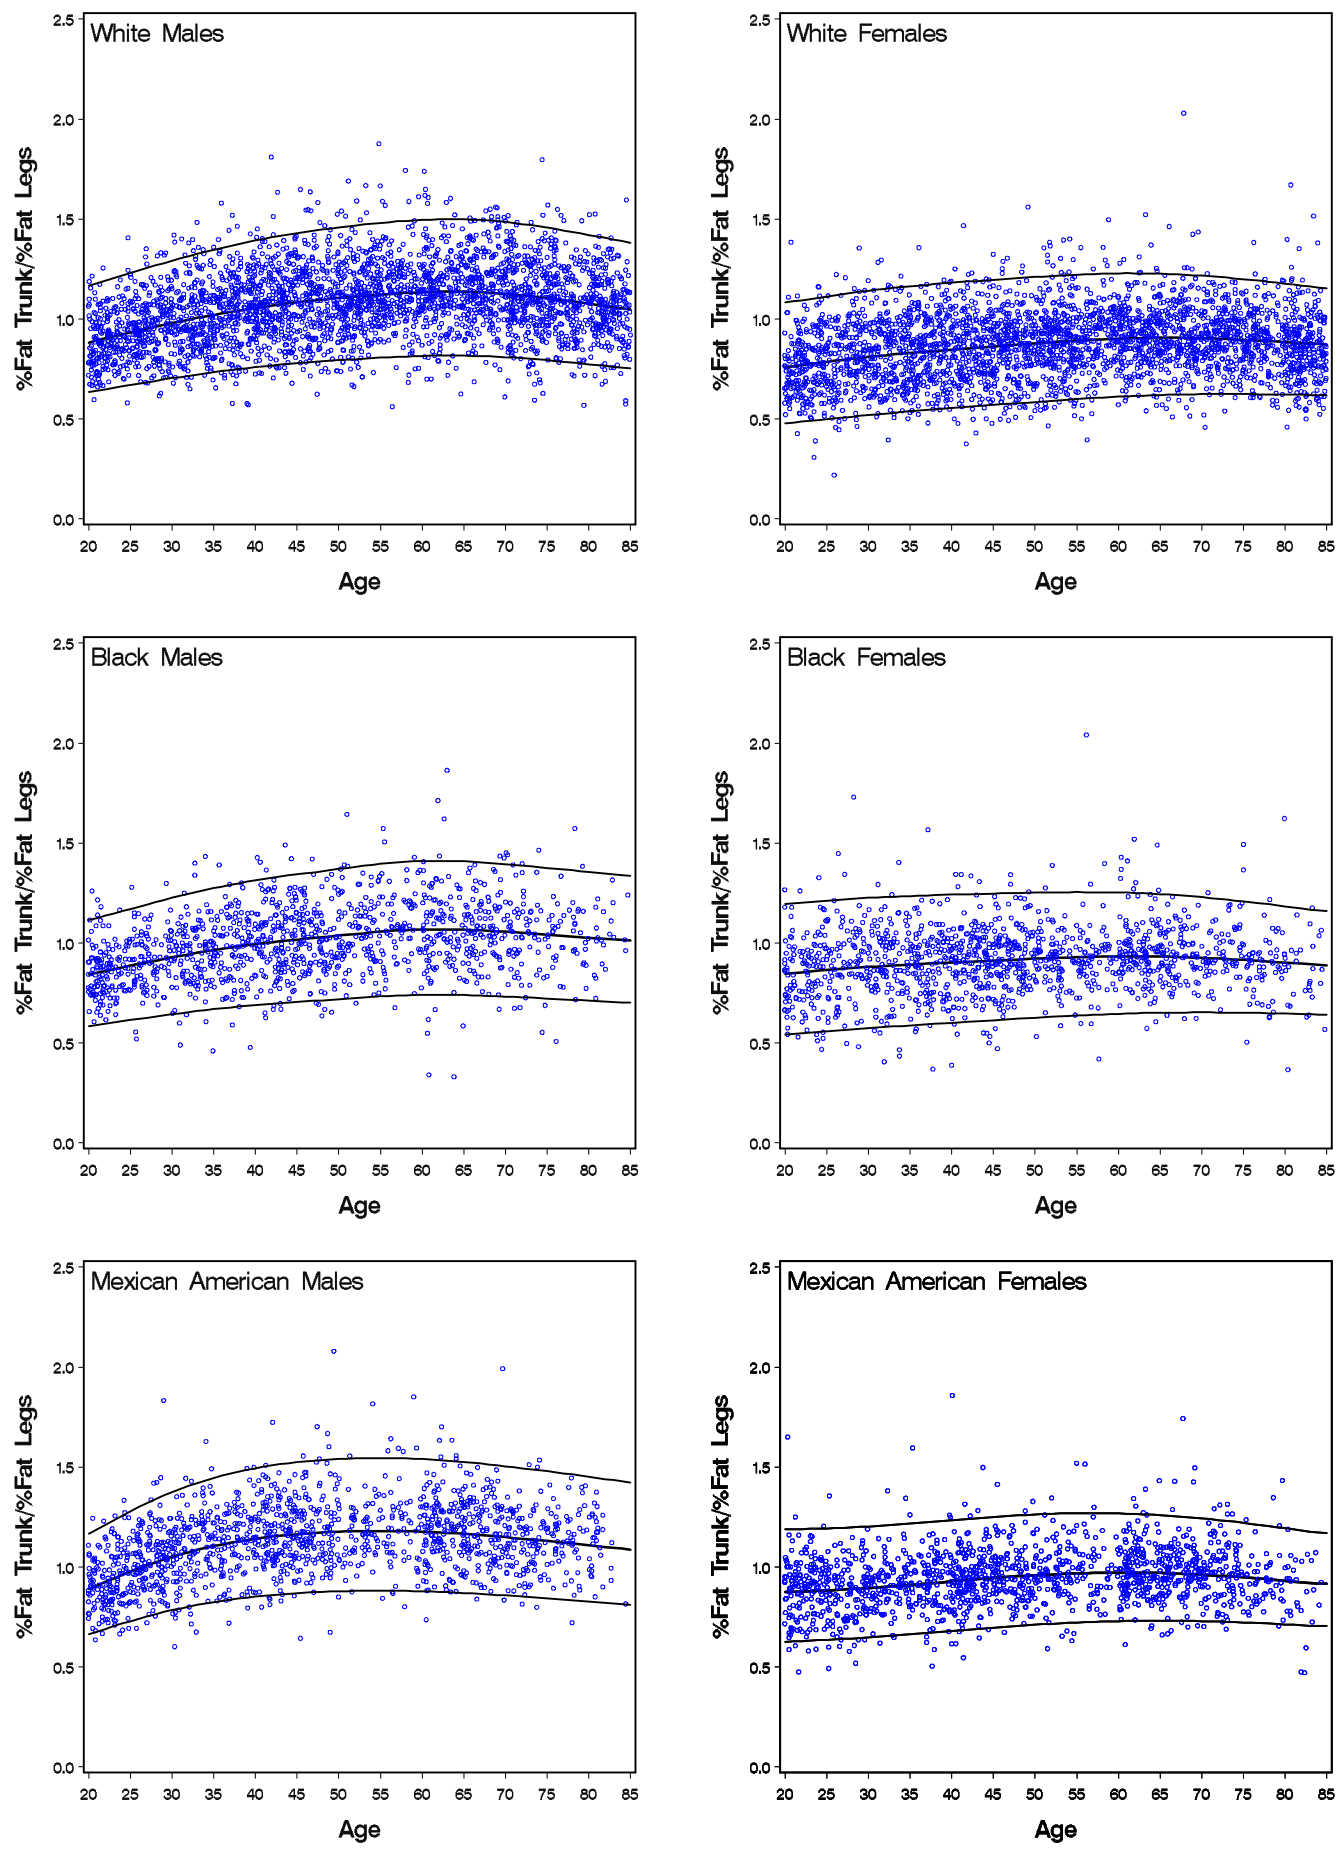

Supplement: Figure S3 — % Fat Trunk/%Fat Legs vs. Age in adults. (0.34 MB PDF) [file pone.0007038.s003.pdf]
