# Supplementary material for: Dual Energy X-Ray Absorptiometry Body Composition Reference Values from NHANES
Source: PLoS One. 2009 Sep 15;4(9):e7038. doi: 10.1371/journal.pone.0007038 (PMC2737140; doi:10.1371/journal.pone.0007038)

**Figure S16:** Total Body BMC (g) vs. Height (cm) in pediatrics. Solid lines indicate the 3<sup>rd</sup>, 50<sup>th</sup>, and 97<sup>th</sup> percentiles.

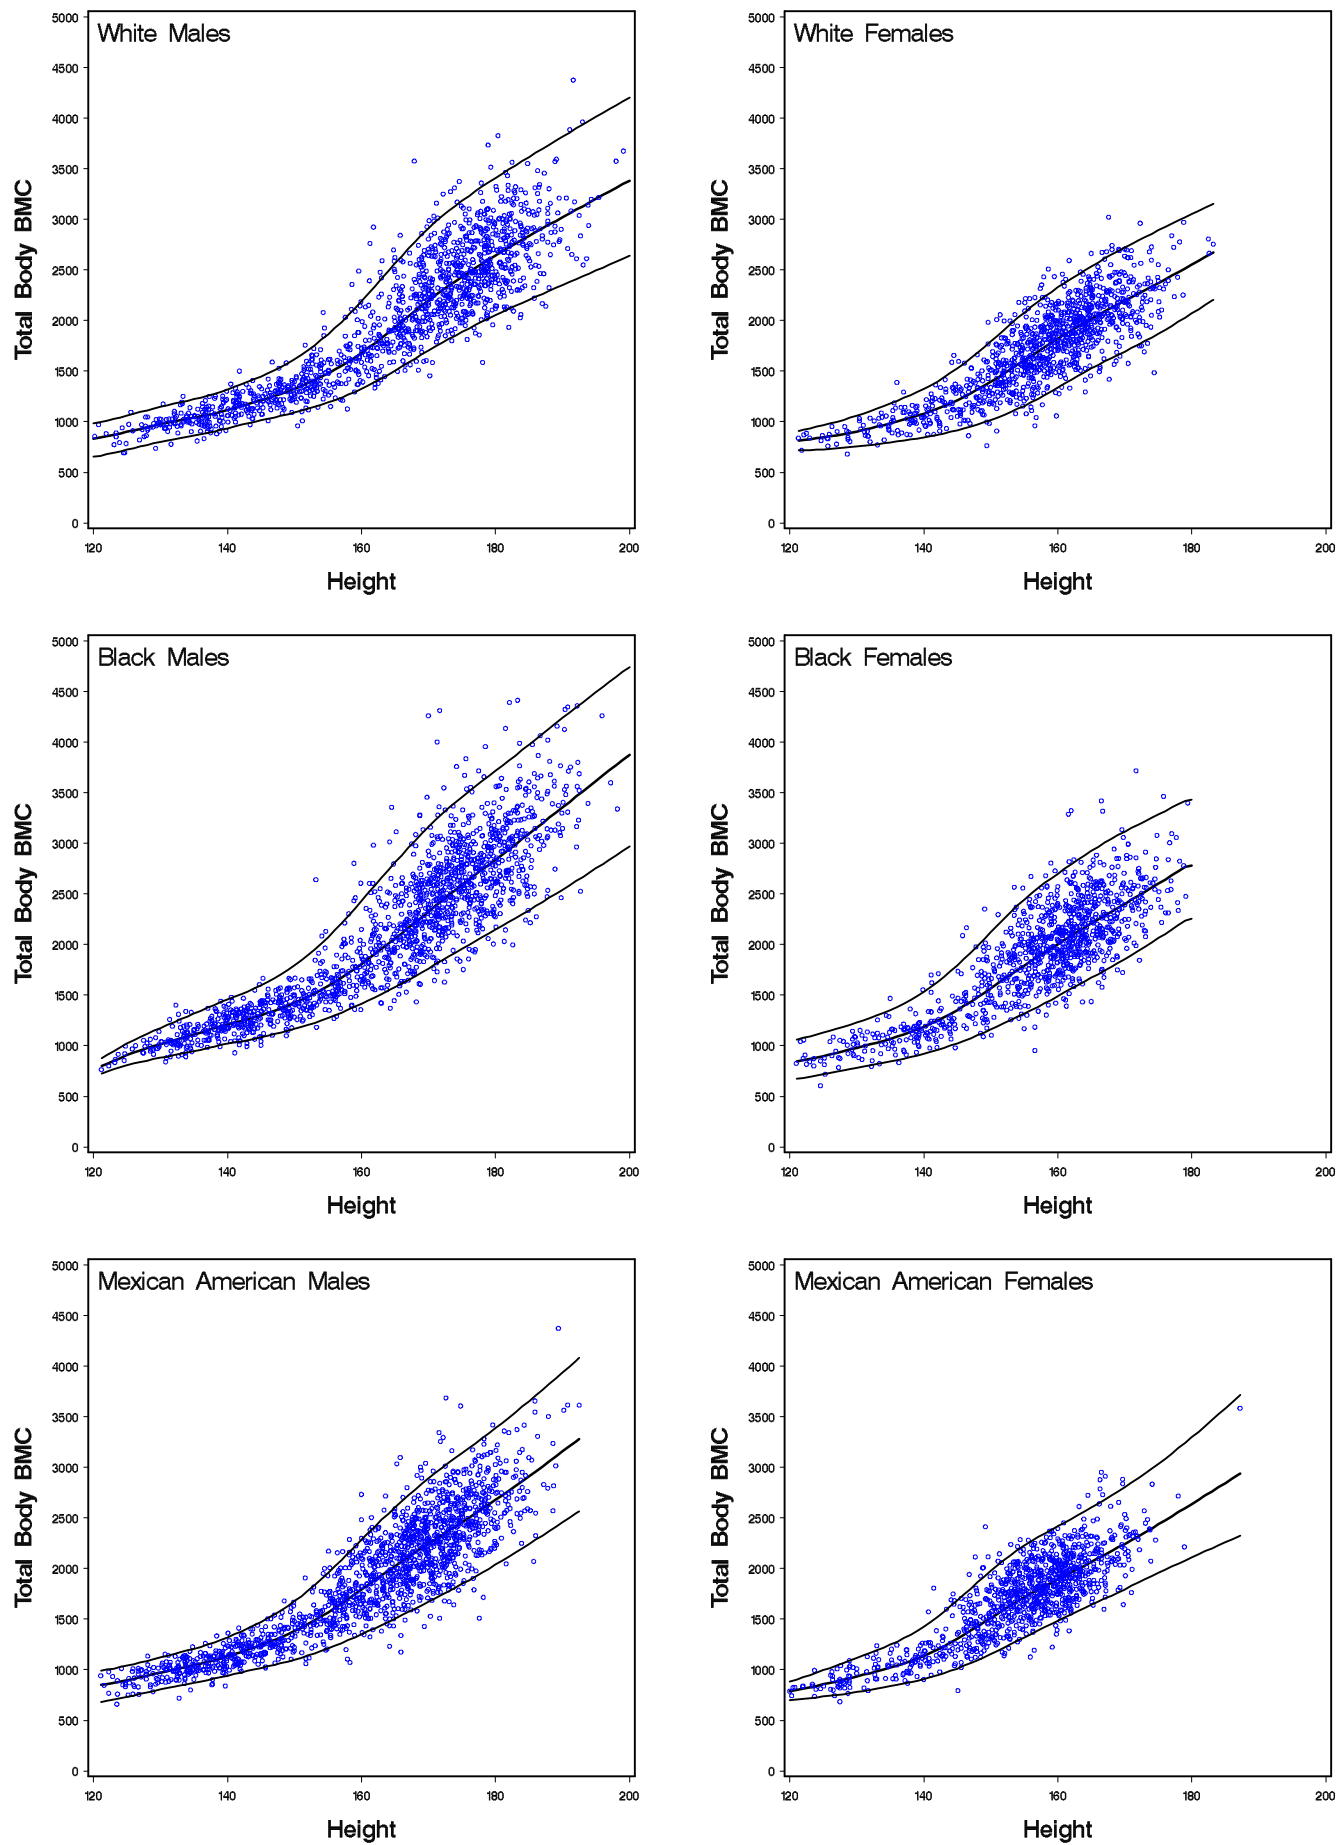

Supplement: Figure S16 — Total Body BMC (g) vs. Height (cm) in pediatrics. (0.24 MB PDF) [file pone.0007038.s016.pdf]
