# Supplementary material for: Dual Energy X-Ray Absorptiometry Body Composition Reference Values from NHANES
Source: PubMed Central journal article supplement (PMC2737140; doi:10.1371/journal.pone.0007038), 2009-09-15

**Figure S2: Percent Fat (%) vs. Age in adults.** Solid lines indicate the 3<sup>rd</sup>, 50<sup>th</sup>, and 97<sup>th</sup> percentiles.

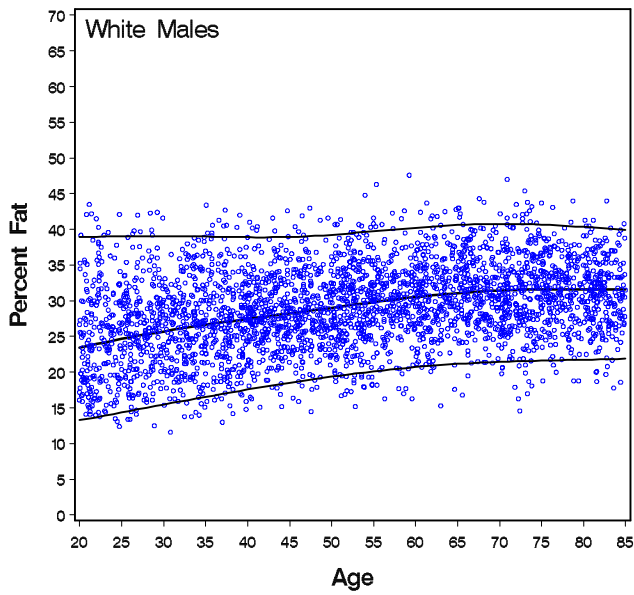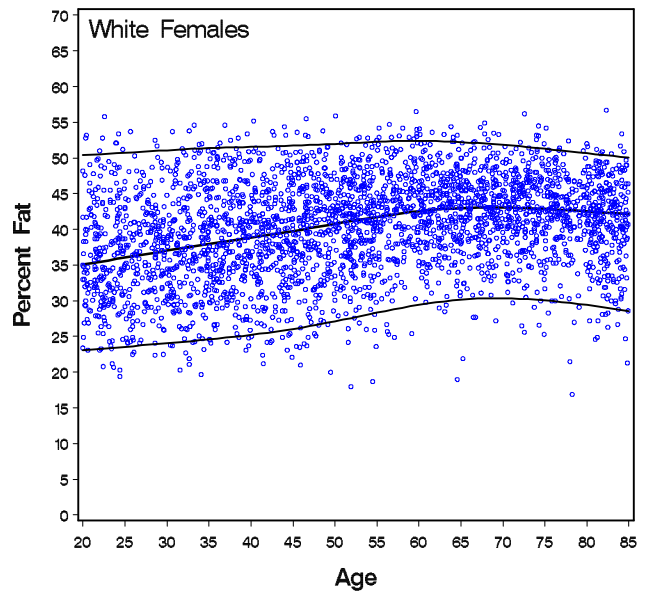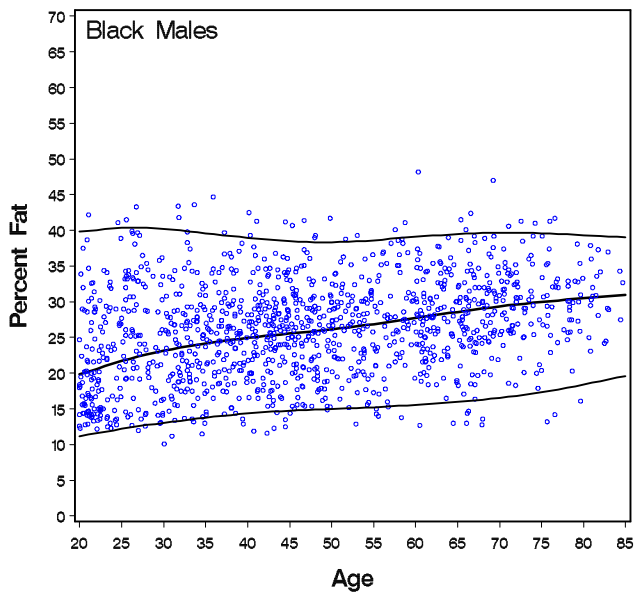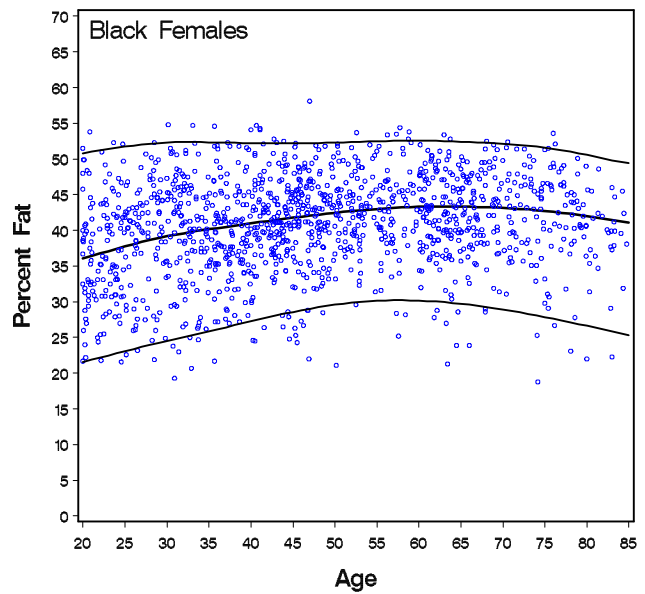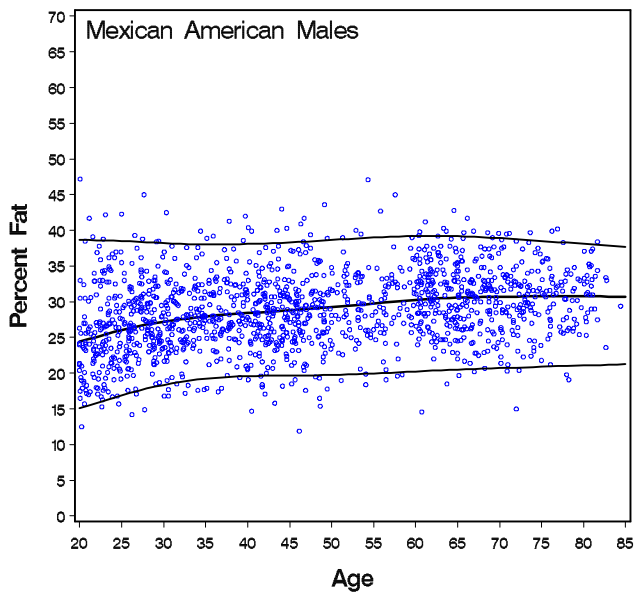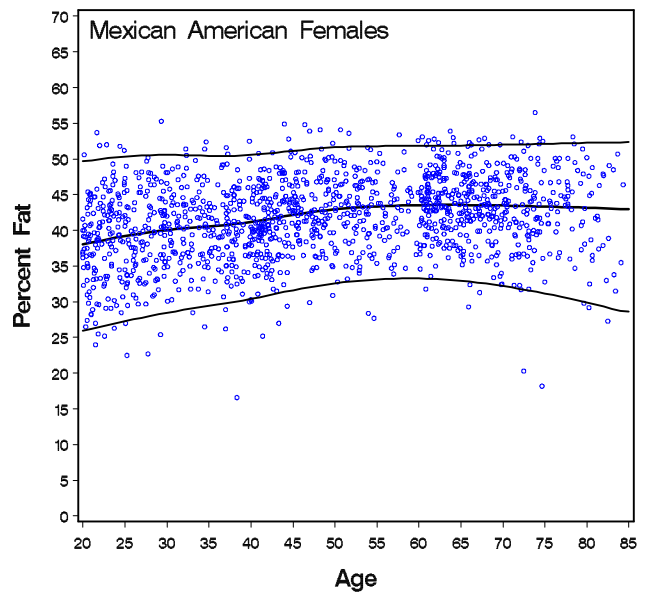

Supplement: pone.0007038.s002.pdf [file pone.0007038.s002.pdf]
