# Supplementary material for: Dual Energy X-Ray Absorptiometry Body Composition Reference Values from NHANES
Source: PubMed Central journal article supplement (PMC2737140; doi:10.1371/journal.pone.0007038), 2009-09-15

**Figure S11: Total Body BMD (g/cm<sup>2</sup>) vs. Age in pediatrics.** Solid lines indicate the 3<sup>rd</sup>, 50<sup>th</sup>, and 97<sup>th</sup> percentiles.

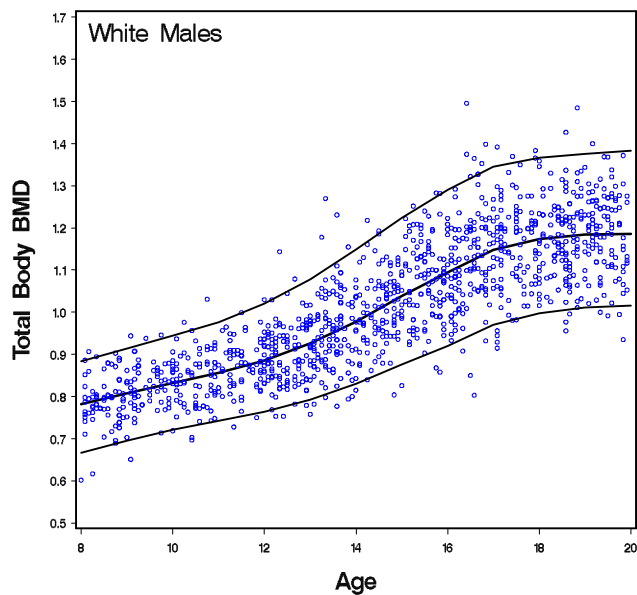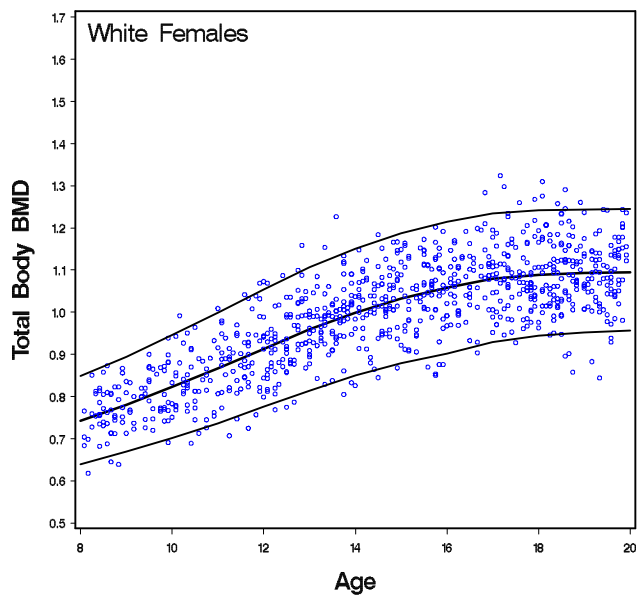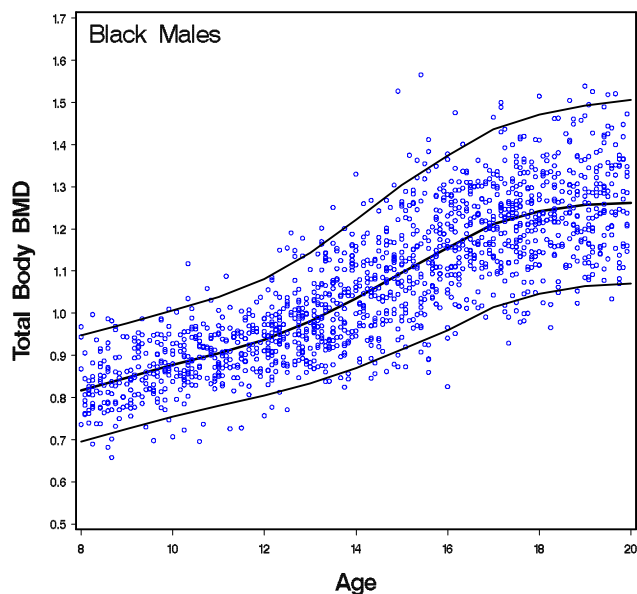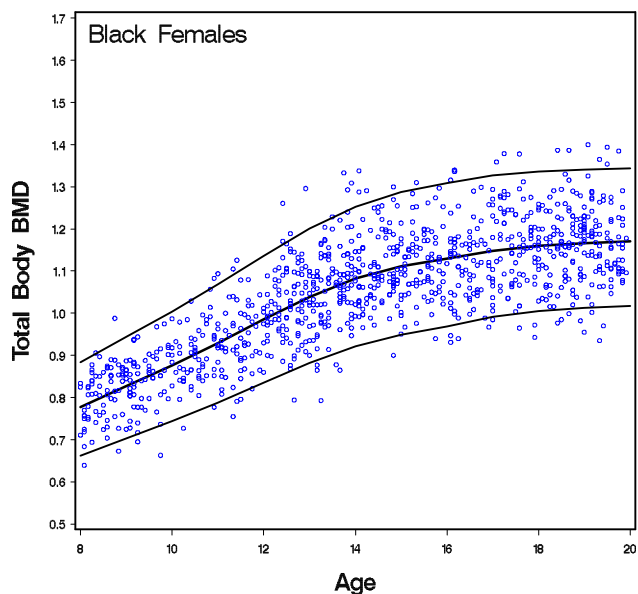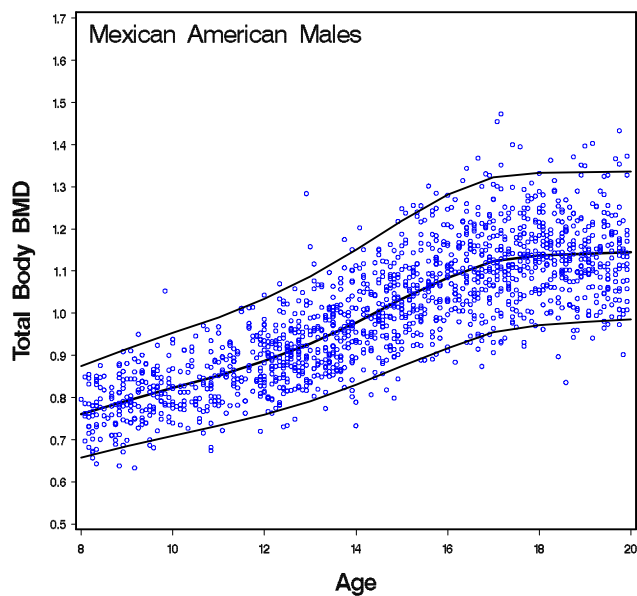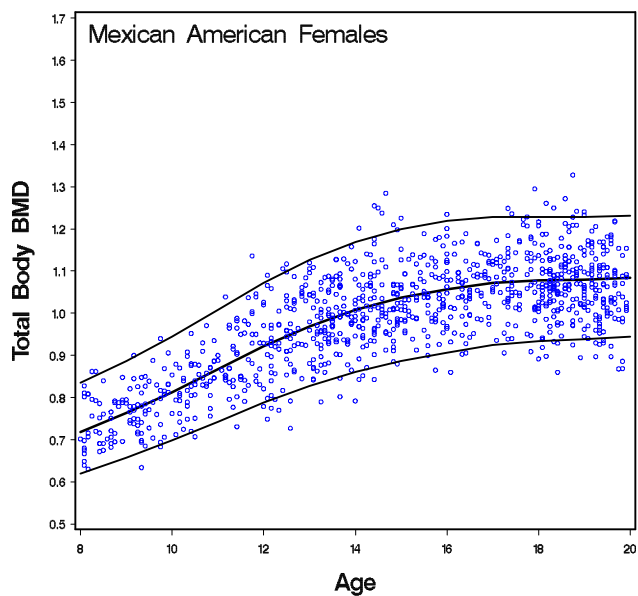

Supplement: pone.0007038.s011.pdf [file pone.0007038.s011.pdf]
