# Supplementary material for: Dual Energy X-Ray Absorptiometry Body Composition Reference Values from NHANES
Source: PubMed Central journal article supplement (PMC2737140; doi:10.1371/journal.pone.0007038), 2009-09-15

**Figure S15:** Total Body BMD ( $\text{g}/\text{cm}^2$ ) vs. Height (cm) in pediatrics. Solid lines indicate the 3<sup>rd</sup>, 50<sup>th</sup>, and 97<sup>th</sup> percentiles.

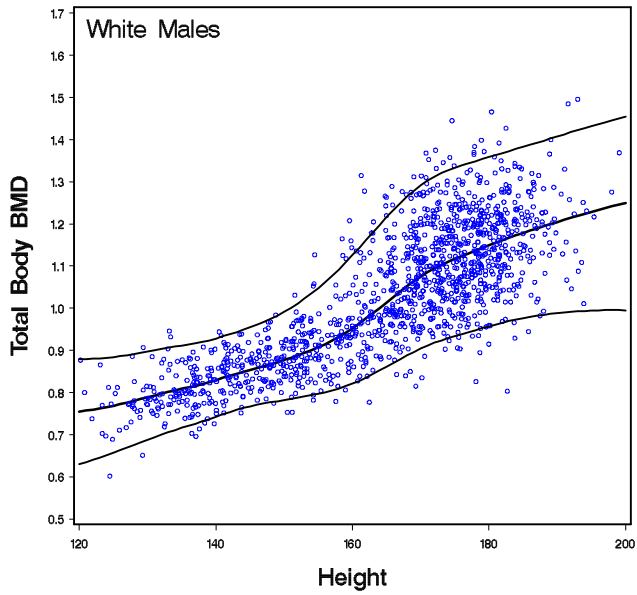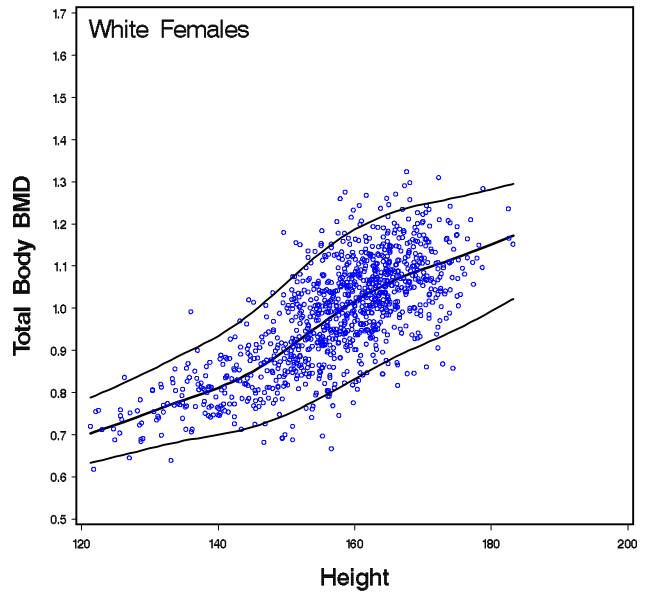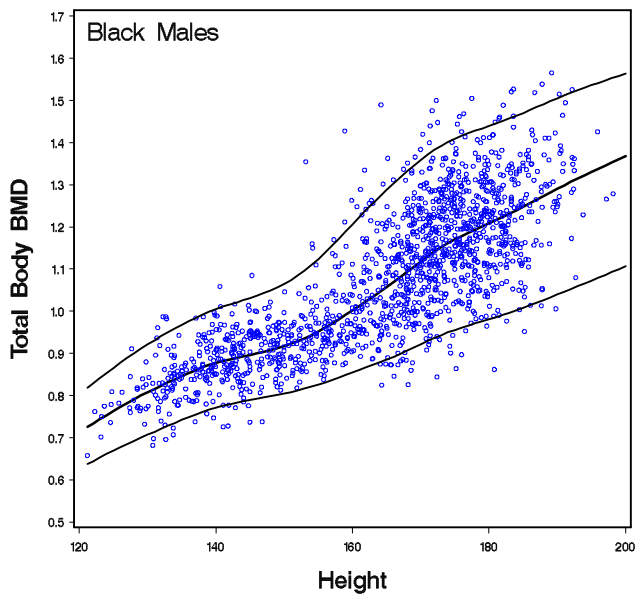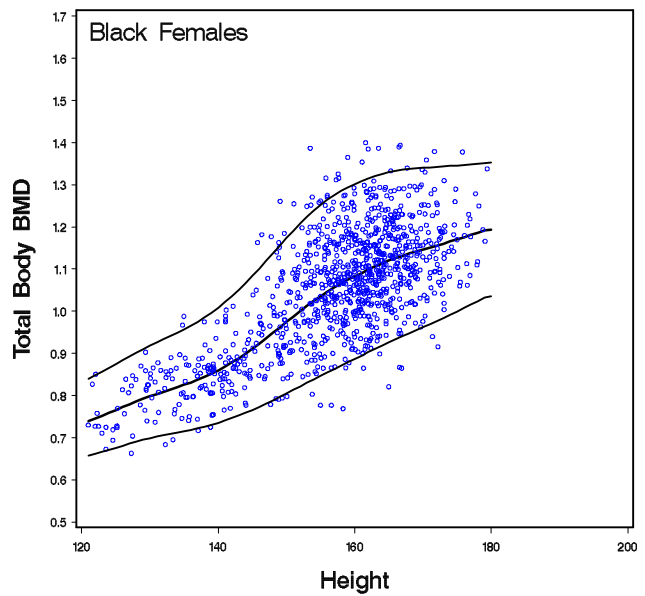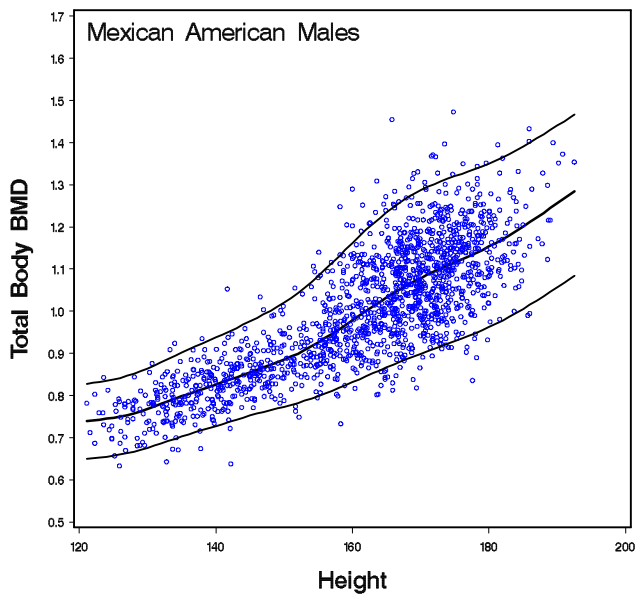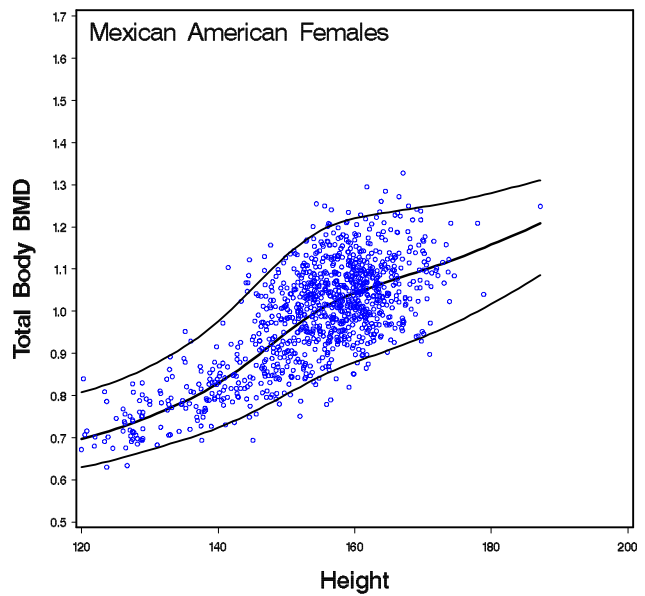

Supplement: pone.0007038.s015.pdf [file pone.0007038.s015.pdf]
