# Supplementary material for: Dual Energy X-Ray Absorptiometry Body Composition Reference Values from NHANES
Source: PLOS journal article supplement (doi:10.1371/journal.pone.0007038), 2009-09-14

**Figure S1:** Fat Mass/Height<sup>2</sup> (kg/m<sup>2</sup>) vs. Age in adults. Solid lines indicate the 3<sup>rd</sup>, 50<sup>th</sup>, and 97<sup>th</sup> percentiles.

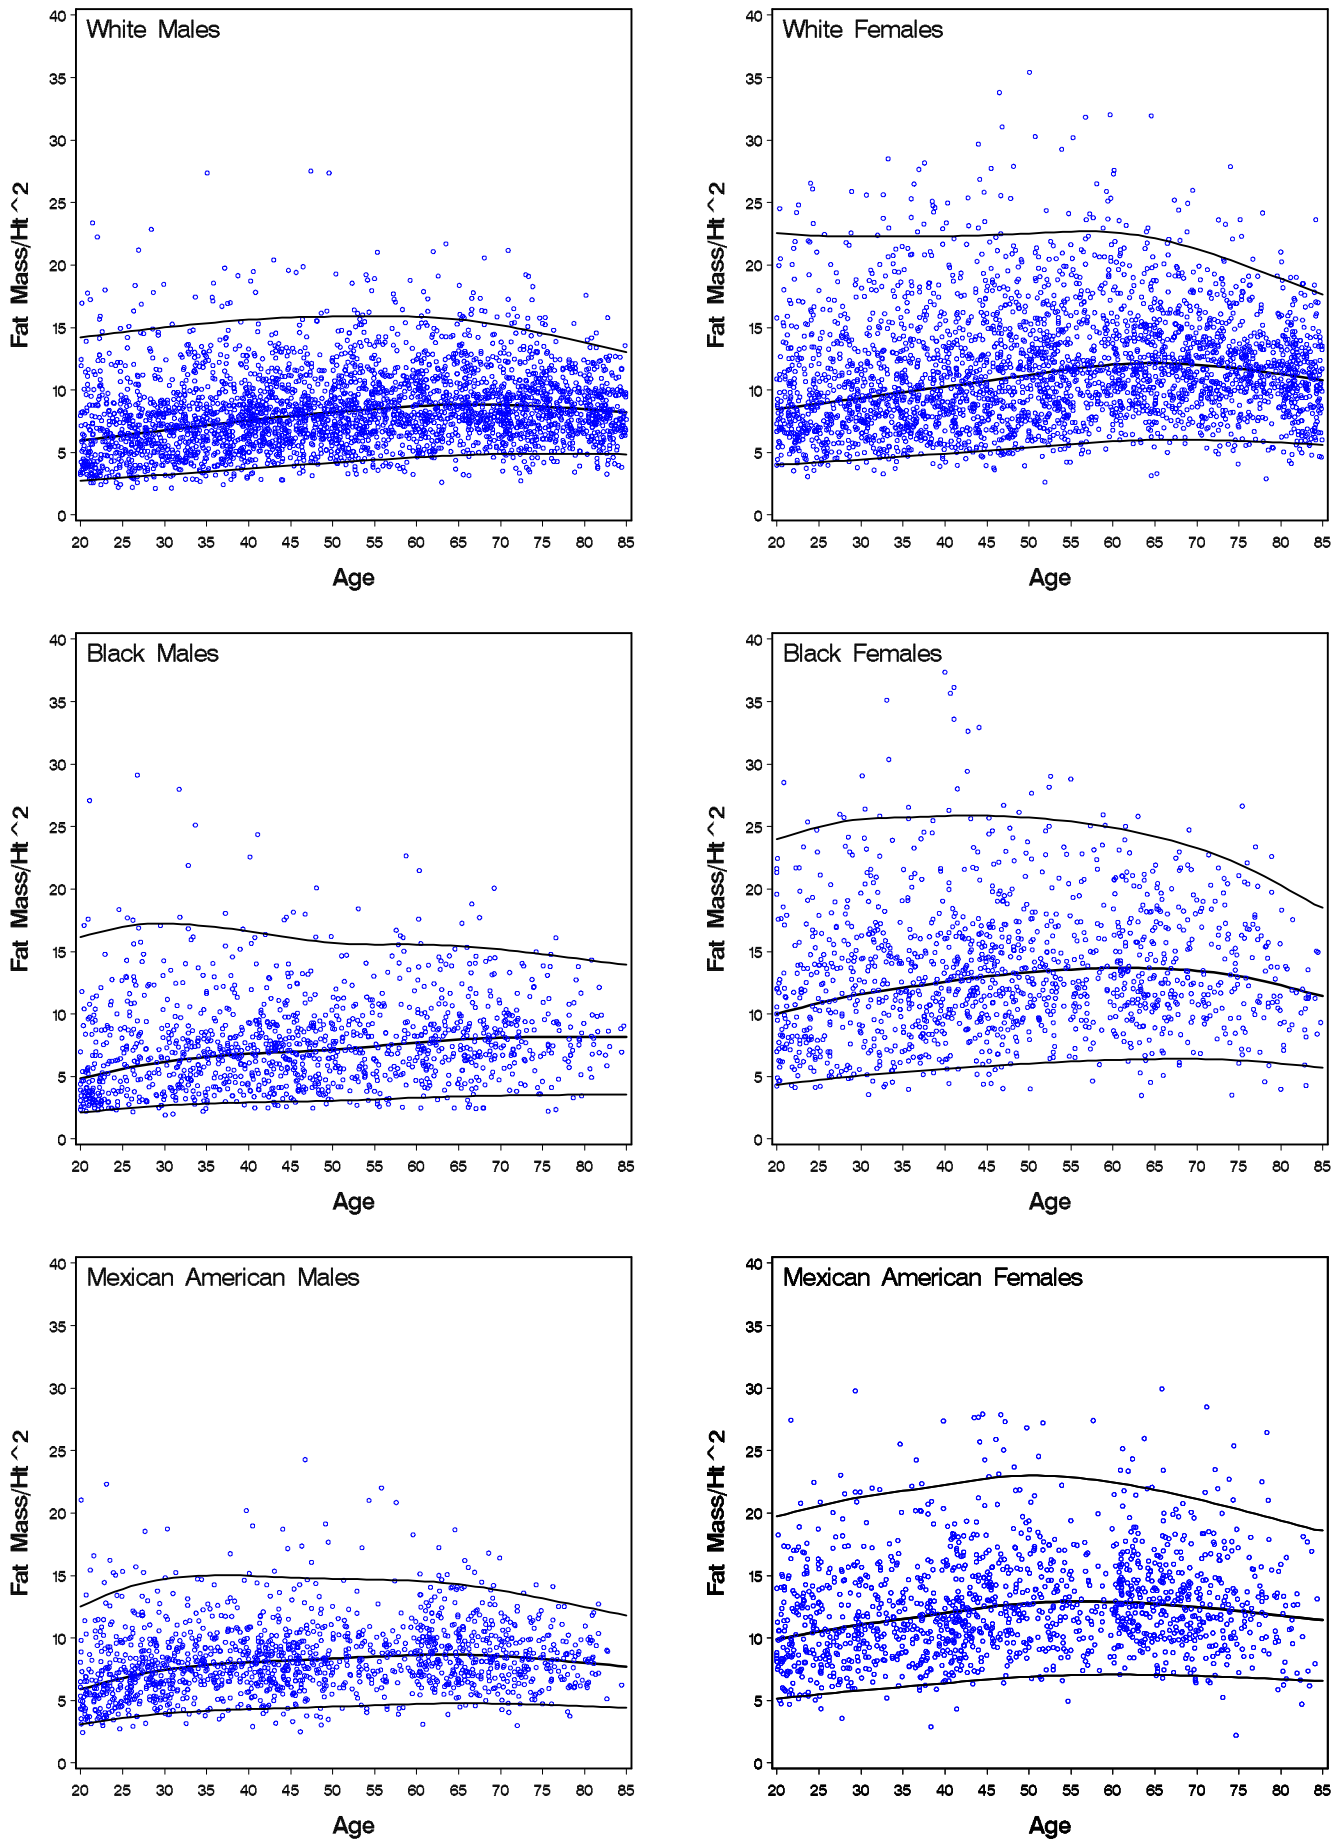

Supplement: S1 (10.1371/journal.pone.0007038.s001) [file journal.pone.0007038.s001]
